# Supplementary material for: 3D spheroid-microvasculature-on-a-chip for tumor-endothelium mechanobiology interplay
Source: bioRxiv or medRxiv preprint supplement (doi:10.1101/2022.11.19.517181), 2022-11-21
Supplement: Supplementary file [file media-1.pdf]

## Supporting information

### Title: 3D spheroid-microvasculature-on-a-chip for tumor-endothelium mechanobiology interplay

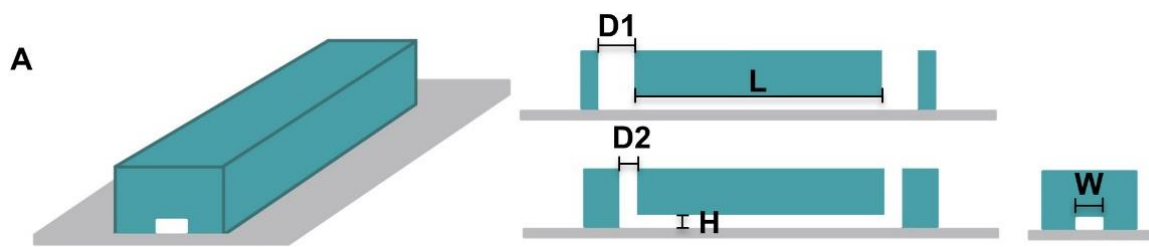

|           |                                                   |                   |
|-----------|---------------------------------------------------|-------------------|
| <b>L</b>  | Total length of channel                           | 25 mm             |
| <b>W</b>  | Width of channel                                  | 600 $\mu\text{m}$ |
| <b>H</b>  | Channel height                                    | 300 $\mu\text{m}$ |
| <b>D1</b> | Diameter of channel reservoir for static culture  | 6 mm              |
| <b>D2</b> | Diameter of channel reservoir for dynamic culture | 2mm               |

**B**

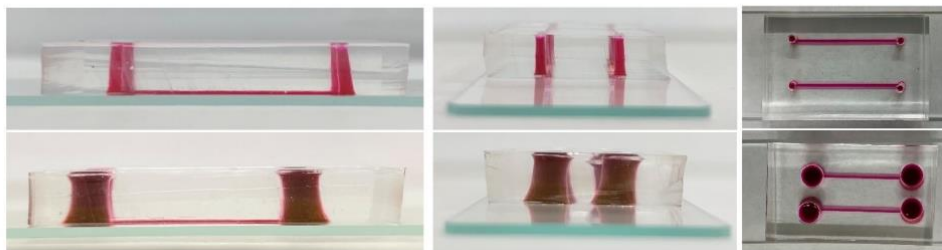

**Supplementary figure 1.** (A) Schematics of the microfluidic channel and its dimension. (B) Images of the SMAC device from different views.

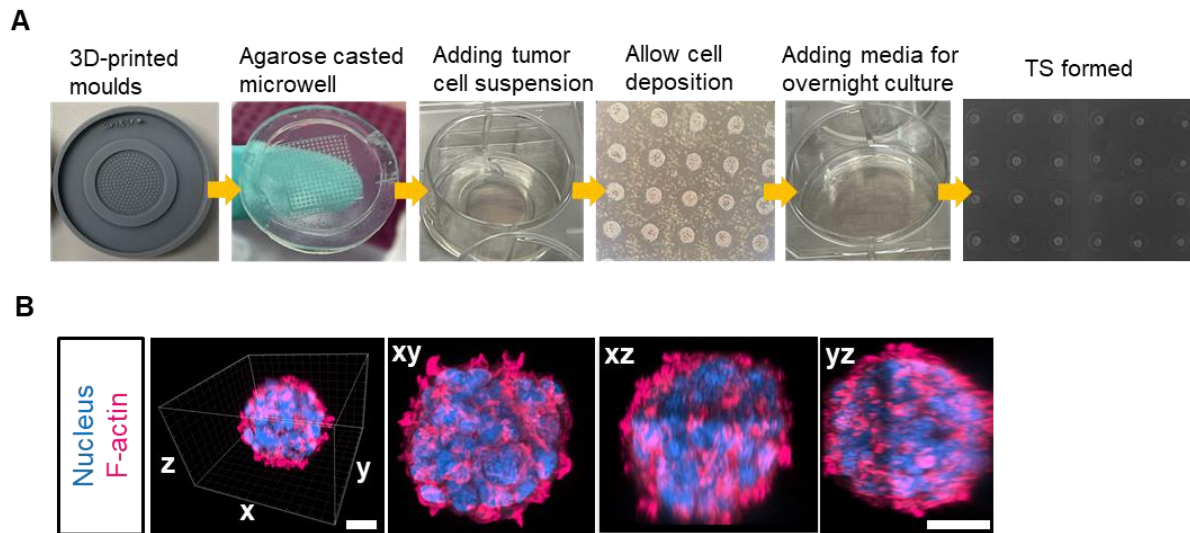

**Supplementary figure 2.** (A) Workflow for tumor spheroid formation. (B) Representative confocal images of the nucleus (*blue*) and F-actin (*magenta*) of MCF-7 spheroids. Scale bar = 30 $\mu$ m.

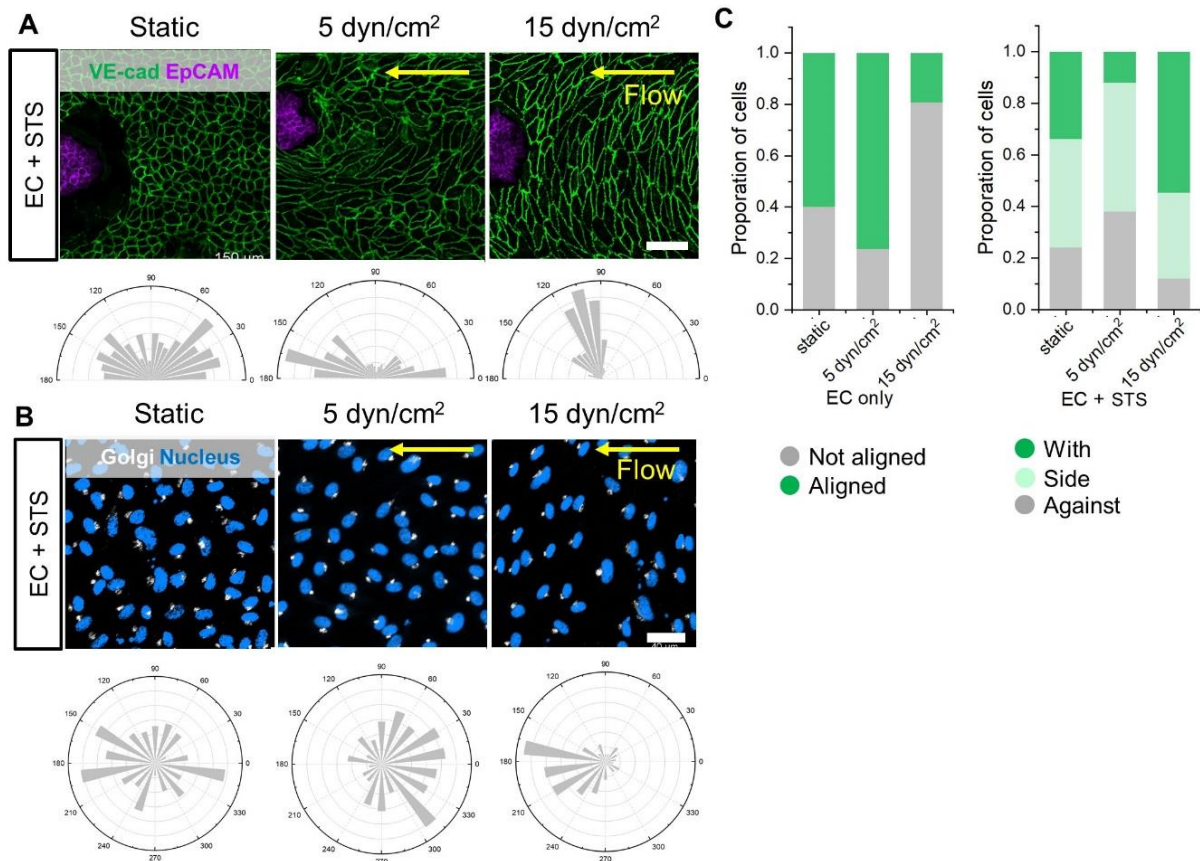

**Supplementary figure 3.** (A) Representative confocal images of ECs with STS exposed to shear stress for 40 hours (static: 0 dyn/cm<sup>2</sup>; 5 dyn/cm<sup>2</sup>; 15 dyn/cm<sup>2</sup>) and associated orientation quantification shown as circular plots. Scale bar = 100μm. (B) Representative confocal images ECs with STS exposed to shear stress for 40 h (static: 0 dyn/cm<sup>2</sup>; 5 dyn/cm<sup>2</sup>; 15 dyn/cm<sup>2</sup>) and associated polarization quantification shown as rose graphs. Scale bars = 40μm. (C) Left: Quantification of the percentage of ECs aligned with the flow direction (in between 45° around the flow axis,) in the presence of STS; Right: Quantification of ECs polarization relative to the flow direction (n = 3; with: in between 135 and 225° around the flow axis, side: 45–135° and 225–315° against 0–45° and 315–360°; approximately 600-700 cells were analyzed).

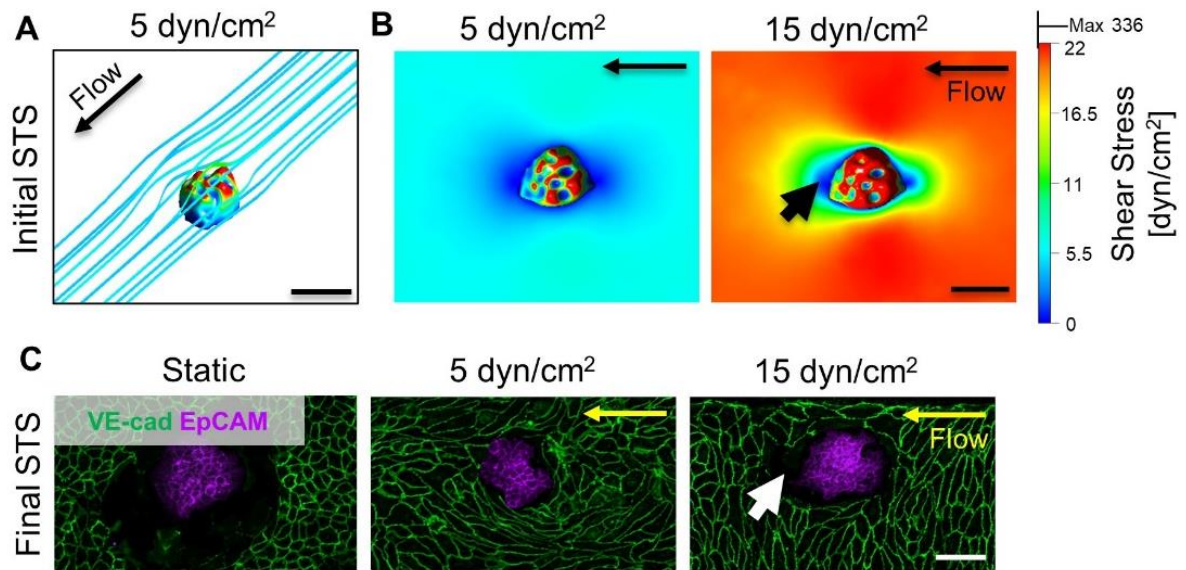

**Supplementary figure 4.** (A) 3D computational fluid dynamic (CFD) simulation of shear rate distribution and flow line around STS. Scale bar = 50 $\mu$ m. (B) The top view of CFD simulation of shear rate distribution of the channel with STS. Scale bar = 50 $\mu$ m. (C) Representative confocal images of STS after 40 hours of static culture (left), exposure to 5 dyn/cm<sup>2</sup> (middle) and 15 dyn/cm<sup>2</sup> (right). Scale bar = 100 $\mu$ m.

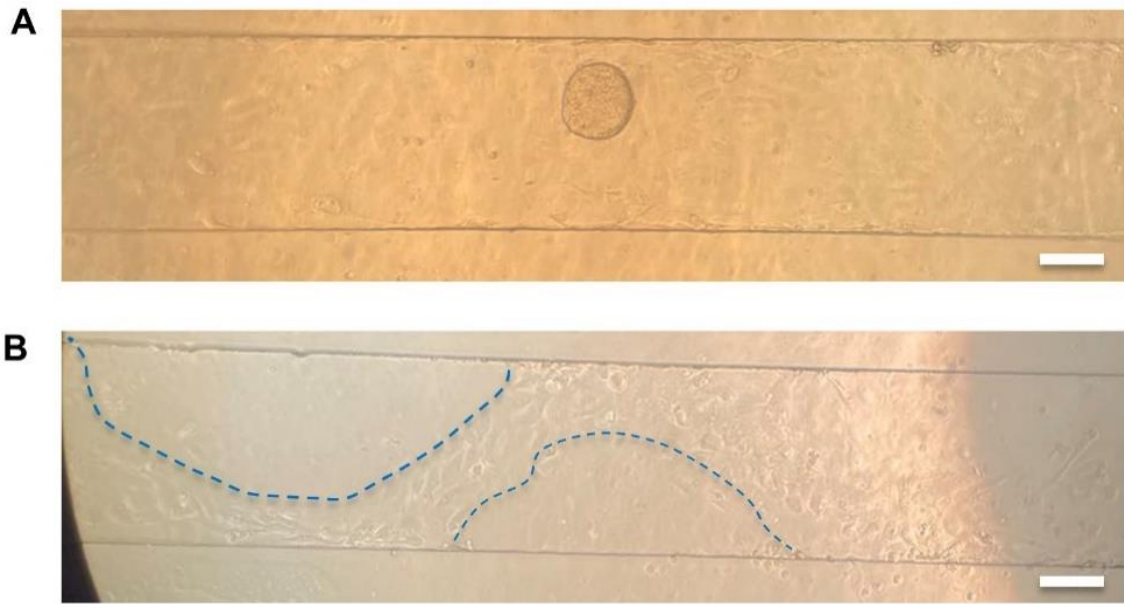

**Supplementary figure 5.** (A) Bright field image of tumor spheroid immediately after being seeded in a microfluidic channel with  $300 \times 100\mu\text{m}$  (width  $\times$  height). Scale bar =  $100\mu\text{m}$ . (B) Bright field image of endothelialized channel ( $300 \times 100\mu\text{m}$ , width  $\times$  height) showing that after exposure to shear overnight, the tumour spheroids were detached. The blue dashed lines outline the original positions of the tumor spheroids. Scale bar =  $100\mu\text{m}$ .
